# Supplementary material
Source: PubMed Central journal article supplement (PMC3796643)
Supplement: JZUSB14-0916DataS1.pdf [file JZUSB14-0916DataS1.pdf]

**Data S1 The pre-miRNAs of potential miRNAs in *C. sinensis***

**miR156**

| UUUA C C -- CU  
 GAUGA GACAGAAGA AG GAGC UGG AG AAGGAU GGUUGAAAGGG G  
 CUACU UUGUUUUUU UC CUCG ACC UC UUCCUA CCGACUUUUC U  
 ^ -- C - - - - GU CU

**miR171a**

UAAAAG C A A G AA-| U  
 GGAAAG AAUAUUG CG GGUUCAAUUCAAG UG UUAUGUU \  
 UUUUUC UUUAUAC GC CCGAGUUAGGUUU AC AAUACAA U  
 ----- ACG G AGA^ G

**miR171b**

UGAU| A CG G AGA G  
 UUUUC UUUAUAC GC CCGAGUUAGGUUU AC AAUACAA \  
 GAAAG AAUAUUG CG GGUUCAAUUCAAG UG UUAUGUU U  
 G---^ C A A G AA- U

**miR397**

U - A CAAGAAA UC -----| G CU  
 GCGUAGUAG UGCG ACGUG GUUAUUGGU AGU UAUCGU UUG UGUUGUU \  
 CGCAUUGUU AUGC UGCAC CAGUGACUA UUA AUAGUA AAC GCAACAA G  
 C U - ----- GA UAACUAGUAUC^ G CA

**miR399**

A - C A A AAC U---| U  
 UAAGC GAA CAGUU UAGGGCAAC CUCC GGCAGCUG UCCUAG \  
 AUUCG CUU GUUAA AUCCCGUUG GAGG CCGUUGAC AGGGUU C  
 A A C C AGAA UAGC^ U

**miR2863**

| C UCUCCAGU AUCUAUC  
 UCUCUC UCUA AUAC AUUCU UUUAGC CU U  
 AGGGAG AGAU UGUG UGAGA GGAUCG GA A  
 ^ - UU- UU A- U AAUAUUAU

**miR2911a**

-- CC AA -- -| U GA GA U  
 UCCCAG CCG CCC GUCGGC UG CCGCG CUGCUC GCUGC C  
AGGGUC GGC GGG CCGCG GC GCCGC GGCAG CCGCG C  
 CA A-AGGC U^ - UG AG C

**miR2911b**

G CGAA - -| U GA GA U  
 UCCCAGUCC CCC GUCGGC UG CCGCG CUGCUC GCUGC C  
AGGGUCAGG GGG CCGCG GC GCCGC GGCAG CCGCG C  
 A CAGGC U^ - UG AG C

**miR5021a**

- - C C CUUC - U - AA CUA| - UUAUCUA AA UC---- A  
 CCCUC CUC CU CUUCUUC UCUUCUU GC UCGUCGUU UC UCUU GU ACUU UUGA UGUGU CCCUUCU CUCUAGUU \  
 GGGAG GAG GA GAAGAAG AGAAGA UG AGCGGCAA GG AGAA CG UGGA AACU AUACG GGAAGA GAGAUCAG U  
 A A - AAGCU A U U -- UG-^ C UAGCAACC A- UCGGAU A

**miR5021b**

A AG GAGAA UUGA U U CGUG--- C UAGCAACC| A--- UACGAU A  
 GGGAG GAG AGA AGAAG AGAAGAAG AAGC AGCGGCAA GG AGAA UGGA AACU GUACG GGAAGA GAGAUCAG \  
 CCCUC CUC UCU UCUUC UCUUCUUC UUCG UCGUCGUU UC UCUU ACUU UUGA UAUGU CCCUUCU UUCUAGUU U  
 - CU --- G - C--- U - AAGUCUA - UAUAUC--^ GUAA UC---- C

**miR5368a**

- UUA UUC G- G UU--- -| GCUU - GGCGAAGAA U  
 CCCUAU GAAGCU CUG CCUGGGAUUG CUUUGG CC UCCUG CGCA AGGU GGAG GGCCCCU C  
 GGGGUA CUUGA GAU GGACUCUGAC GAACC GG AGGAC GUGU UCCA UCUU CCGGGGG C  
 U CA- --- AG G CAUCC U^ ---- A AAGAUCG-- G

**miR5368b**

UUU C- G- G UU--- -| GCUU - GGCGAAGAA U  
 ACUGUU CCUGGGAUUG CUUUGG CC UCCUG CGCA AGGU GGAG GGCCCCU C  
 UGACAG GGACUCUGAC GAACC GG AGGAC GUGU UCCA UCUU CCGGGGG C  
 UU- AUAG G CAUCC U^ ---- A AAGAUCG-- G

**miR6483a**

AC--AU -----| C AGC C  
UAGGGUUUUA GA GUUAUUA ACC AUCC GAU \  
 AUCCGGAGAUU CU CAGUAAU UGG UAGG CUA A  
 UAUC C - AUAAUAGCAUAAUCG^ A GAA U

**miR6483b**

UUA CAU -----| C AGC C  
 GUA UAGGGUUUUA GA GUUAUUA ACC AUCC GAU \  
 UAU AUCCGGAGAUU CU CAGUAAU UGG UAGG CUA A  
 UUC CC C - AUAAUAGCAUAAUCG^ A GAA U
